# Supplementary material for: Theoretical insights into dopamine photochemistry adsorbed on graphene-type nanostructures
Source: Royal Society of Chemistry journal article supplement (doi:10.1039/d4cp00432a), 2024-01-01

Supporting Information  
for

**Theoretical insights into dopamine photochemistry adsorbed on graphene-type nanostructures**

by

*Alex-Adrian Farcaş and Attila Bende*

National Institute for Research and Development of Isotopic and Molecular Technologies, 67-103  
Donath str., RO-400293, Cluj-Napoca, Romania; e-mail: [attila.bende@itim-cj.ro](mailto:attila.bende@itim-cj.ro) (A. Bende)

Contents

|                                                                                                                    |   |
|--------------------------------------------------------------------------------------------------------------------|---|
| 1. UV-Vis adsorption and excited state relaxation for dopamine-o-quinone (DAQ).....                                | 2 |
| 2. Electronic excited states and theoretical UV-absorption spectra for GrNP- and GrS-type graphene structures..... | 3 |
| 3. Electronic excited states and theoretical UV-absorption spectra for GrNP – DA binary complex. ....              | 6 |
| 4. Electronic excited states and theoretical UV-absorption spectra for GrNP – DAQ binary complex.....              | 9 |

## 1. UV-Vis adsorption and excited state relaxation for dopamine-o-quinone (DAQ)

**Table S1.** The excitation energy (in eV and nm in parenthesis), oscillator strength and the orbital transition with the largest coefficient computed for the first 14 electronic excited states of the dopamine-o-quinone at TDDFT/ $\omega$ B97X-D3BJ/def2-TZVPP level of theory (H = HOMO and L = LUMO).

|             |                           |                       |                       |                           |                           |                        |                       |
|-------------|---------------------------|-----------------------|-----------------------|---------------------------|---------------------------|------------------------|-----------------------|
|             | $S_1$                     | $S_2$                 | $S_3$                 | $S_4$                     | $S_5$                     | $S_6$                  | $S_7$                 |
| Energy      | 2.36<br>(526)             | 3.79<br>(327)         | 3.93<br>(315)         | 5.44<br>(228)             | 6.19<br>(200)             | 6.38<br>(194)          | 6.53<br>(190)         |
| Osc. Str.   | 0.00003                   | 0.00001               | 0.07752               | 0.00001                   | 0.00019                   | 0.17737                | 0.00000               |
| Orb. Trans. | H $\rightarrow$ L         | H - 3 $\rightarrow$ L | H - 1 $\rightarrow$ L | H - 2 $\rightarrow$ L     | H $\rightarrow$ L + 1     | H - 4 $\rightarrow$ L  | H $\rightarrow$ L + 2 |
|             | $S_8$                     | $S_9$                 | $S_{10}$              | $S_{11}$                  | $S_{12}$                  | $S_{13}$               | $S_{14}$              |
| Energy      | 6.82<br>(182)             | 6.89<br>(180)         | 7.12<br>(174)         | 7.37<br>(168)             | 7.64<br>(162)             | 7.77<br>(160)          | 7.80<br>(159)         |
| Osc. Str.   | 0.02025                   | 0.00012               | 0.00038               | 0.27744                   | 0.78035                   | 0.00614                | 0.06234               |
| Orb. Trans. | H - 2 $\rightarrow$ L + 3 | H - 6 $\rightarrow$ L | H - 8 $\rightarrow$ L | H - 1 $\rightarrow$ L + 1 | H - 1 $\rightarrow$ L + 2 | H - 12 $\rightarrow$ L | H - 7 $\rightarrow$ L |

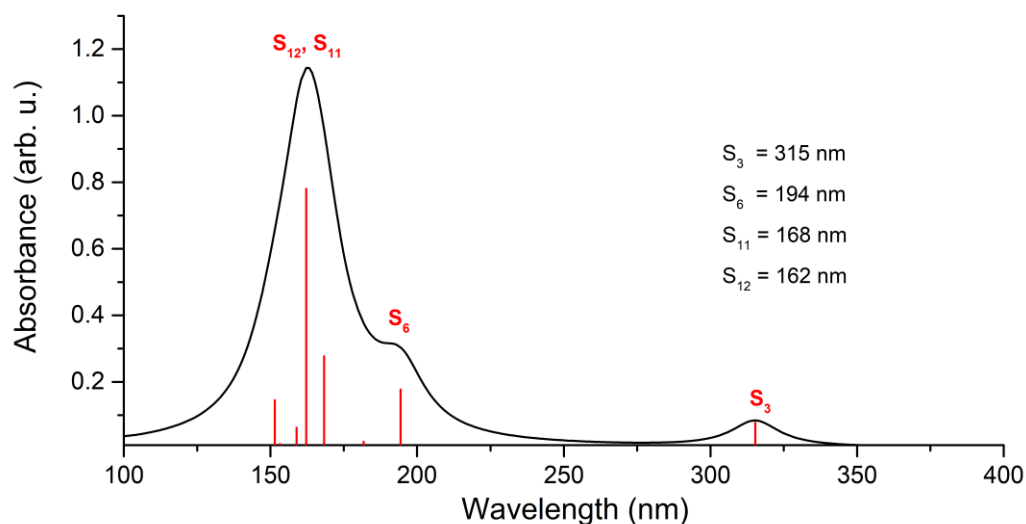

**Figure S1.** Theoretical UV-absorption spectra for DAQ, computed at TDDFT/ $\omega$ B97X-D3BJ/def2-TZVPP level of theory.

## 2. Electronic excited states and theoretical UV-absorption spectra for GrNP- and GrS-type graphene structures

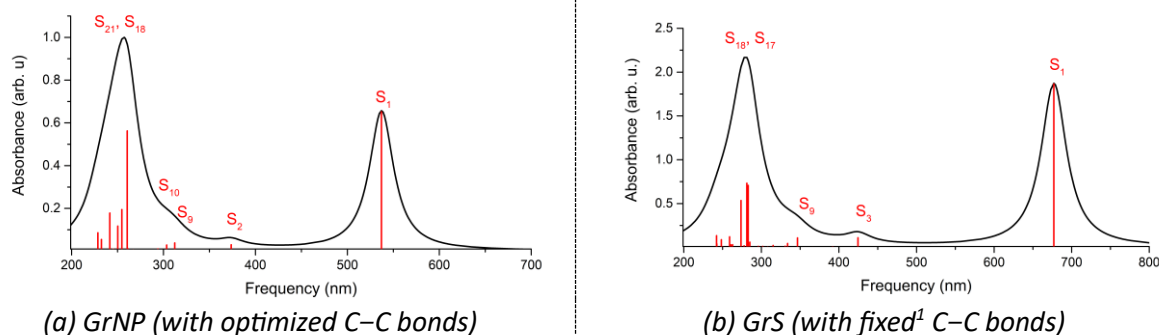

**Figure S2.** Theoretical UV-absorption spectra for GrNP- (a) and GrS-type (b) graphene nanoparticle geometries, computed at TDDFT/ $\omega$ B97X-D3BJ/def2-TZVPP level of theory.

**Table S2.** The excitation energy, oscillator strength and the largest orbital transition coefficients of the first 30 electronic excited states computed for the GrNP- and GrS-type graphene nanoparticle geometries at TDDFT/ $\omega$ B97X-D3BJ/def2-TZVPP level of theory (H = HOMO and L = LUMO). The most relevant electronic excited states are marked with red color.

| GrNP     |            |          |                                              | GrS      |            |          |                                            |
|----------|------------|----------|----------------------------------------------|----------|------------|----------|--------------------------------------------|
| Nr.      | Freq. (nm) | Strength | orb. trans.                                  | Nr.      | Freq. (nm) | Strength | orb. trans.                                |
| $S_1$    | 537.1      | 1.7945   | H $\rightarrow$ L                            | $S_1$    | 677.0      | 1.8644   | H $\rightarrow$ L                          |
| $S_2$    | 373.7      | 0.0823   | H $\rightarrow$ L+1<br>H-1 $\rightarrow$ L   | $S_2$    | 435.0      | 0.0007   | H $\rightarrow$ L+2                        |
| $S_3$    | 373.2      | 0.0002   | H $\rightarrow$ L+2                          | $S_3$    | 424.7      | 0.1096   | H $\rightarrow$ L+1                        |
| $S_4$    | 363.2      | 0.0009   | H-3 $\rightarrow$ L                          | $S_4$    | 399.9      | 0.0011   | H-3 $\rightarrow$ L<br>H $\rightarrow$ L+3 |
| $S_5$    | 355.9      | 0.0000   | H $\rightarrow$ L+3                          | $S_5$    | 399.4      | 0.0001   | H-2 $\rightarrow$ L                        |
| $S_6$    | 339.3      | 0.0017   | H $\rightarrow$ L+5                          | $S_6$    | 391.9      | 0.0061   | H-1 $\rightarrow$ L                        |
| $S_7$    | 324.9      | 0.0006   | H-1 $\rightarrow$ L<br>H $\rightarrow$ L+1   | $S_7$    | 366.0      | 0.0020   | H $\rightarrow$ L+4                        |
| $S_8$    | 321.6      | 0.0055   | H-2 $\rightarrow$ L                          | $S_8$    | 364.9      | 0.0002   | H $\rightarrow$ L+5                        |
| $S_9$    | 312.3      | 0.1052   | H $\rightarrow$ L+7                          | $S_9$    | 346.6      | 0.1074   | H $\rightarrow$ L+6<br>H $\rightarrow$ L+7 |
| $S_{10}$ | 303.5      | 0.0790   | H-5 $\rightarrow$ L                          | $S_{10}$ | 333.9      | 0.0446   | H-6 $\rightarrow$ L                        |
| $S_{11}$ | 302.7      | 0.0100   | H $\rightarrow$ L+7<br>H-2 $\rightarrow$ L   | $S_{11}$ | 330.6      | 0.0131   | H $\rightarrow$ L+7                        |
| $S_{12}$ | 294.0      | 0.0282   | H-1 $\rightarrow$ L+5<br>H $\rightarrow$ L+8 | $S_{12}$ | 315.2      | 0.0218   | H-5 $\rightarrow$ L<br>H $\rightarrow$ L+8 |
| $S_{13}$ | 284.5      | 0.0150   | H $\rightarrow$ L+9                          | $S_{13}$ | 308.2      | 0.0051   | H $\rightarrow$ L+9                        |
| $S_{14}$ | 281.1      | 0.0032   | H-4 $\rightarrow$ L                          | $S_{14}$ | 301.8      | 0.0105   | H-4 $\rightarrow$ L                        |
| $S_{15}$ | 267.2      | 0.0201   | H-6 $\rightarrow$ L                          | $S_{15}$ | 296.2      | 0.0115   | H $\rightarrow$ L+8<br>H-8 $\rightarrow$ L |

<sup>1</sup> The length of each C–C bond was fixed to 1.42 Å.

|                 |       |        |                        |                 |       |        |                        |
|-----------------|-------|--------|------------------------|-----------------|-------|--------|------------------------|
| S <sub>16</sub> | 265.6 | 0.0041 | H-5 → L<br>H-7 → L     | S <sub>16</sub> | 285.2 | 0.0585 | H-5 → L<br>H → L+7     |
| S <sub>17</sub> | 261.3 | 0.0310 | H-9 → L                | S <sub>17</sub> | 283.2 | 0.7067 | H-3 → L                |
| S <sub>18</sub> | 260.6 | 1.5476 | H → L+4                | S <sub>18</sub> | 281.3 | 0.7330 | H-7 → L                |
| S <sub>19</sub> | 258.7 | 0.0096 | H-3 → L+2              | S <sub>19</sub> | 277.8 | 0.0177 | H → L+11               |
| S <sub>20</sub> | 257.4 | 0.0000 | H-9 → L                | S <sub>20</sub> | 273.8 | 0.5347 | H → L+10               |
| S <sub>21</sub> | 254.8 | 0.5355 | H → L+10               | S <sub>21</sub> | 271.5 | 0.0024 | H-9 → L                |
| S <sub>22</sub> | 252.0 | 0.0046 | H-2 → L+3              | S <sub>22</sub> | 266.3 | 0.0001 | H-2 → L+4<br>H → L+13  |
| S <sub>23</sub> | 250.3 | 0.3219 | H → L+11               | S <sub>23</sub> | 263.0 | 0.0302 | H-3 → L+2<br>H-2 → L+3 |
| S <sub>24</sub> | 245.2 | 0.0256 | H-10 → L               | S <sub>24</sub> | 260.9 | 0.0289 | H-1 → L+1              |
| S <sub>25</sub> | 241.6 | 0.4908 | H-2 → L+4              | S <sub>25</sub> | 259.1 | 0.1202 | H-10 → L               |
| S <sub>26</sub> | 238.4 | 0.0014 | H-2 → L+5              | S <sub>26</sub> | 258.6 | 0.0000 | H-7 → L<br>H → L+9     |
| S <sub>27</sub> | 232.5 | 0.1506 | H-1 → L+4              | S <sub>27</sub> | 250.2 | 0.0052 | H-10 → L<br>H-2 → L+5  |
| S <sub>28</sub> | 232.3 | 0.0022 | H-1 → L+2<br>H-2 → L+1 | S <sub>28</sub> | 248.5 | 0.0873 | H-1 → L+4              |
| S <sub>29</sub> | 229.3 | 0.0204 | H-1 → L+3              | S <sub>29</sub> | 242.6 | 0.0393 | H-1 → L+4              |
| S <sub>30</sub> | 228.7 | 0.2366 | H-3 → L+1<br>H-1 → L+4 | S <sub>30</sub> | 242.2 | 0.1338 | H-1 → L+5              |

**Table S3.** The natural difference orbitals (NDO) between the ground and the given electronic excited state computed for the the GrNP- and GrS-type graphene geometries at TDDFT/ $\omega$ B97X-D3BJ/def2-TZVPP level of theory.

**GrNP:**

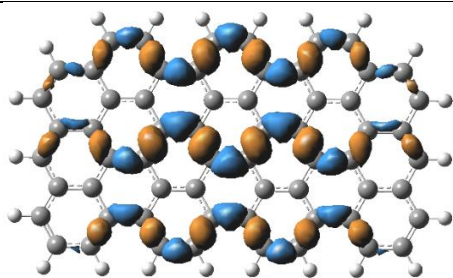

S<sub>1</sub>

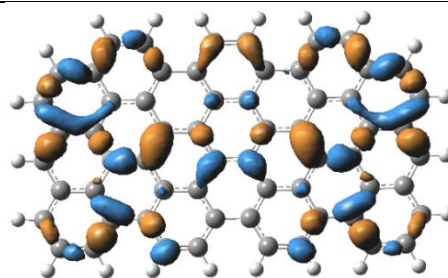

S<sub>2</sub>

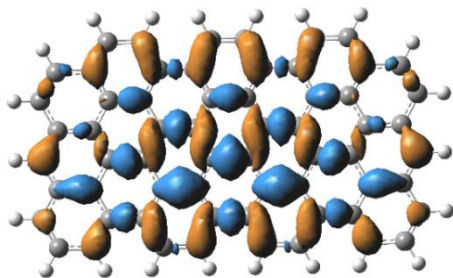

S<sub>9</sub>

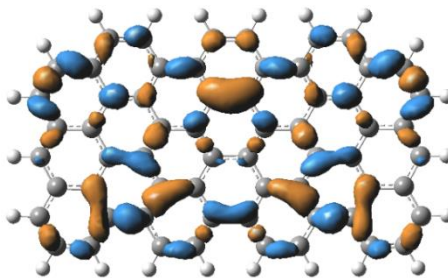

S<sub>10</sub>

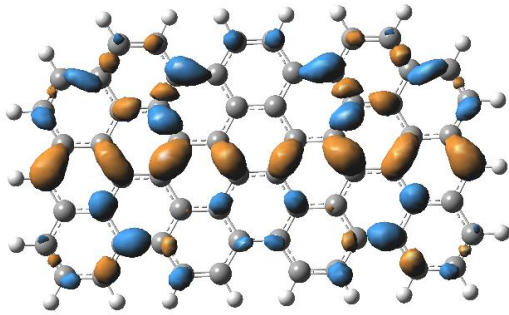

$S_{18}$

---

GrS:

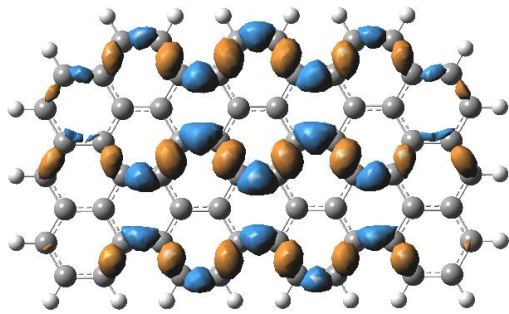

$S_1$

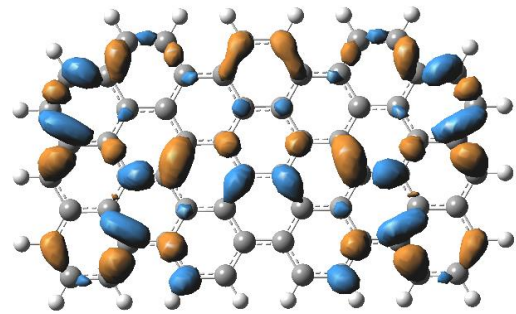

$S_3$

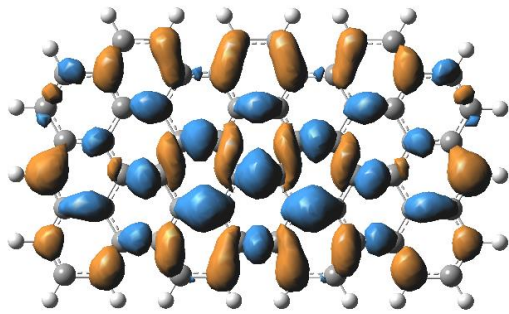

$S_9$

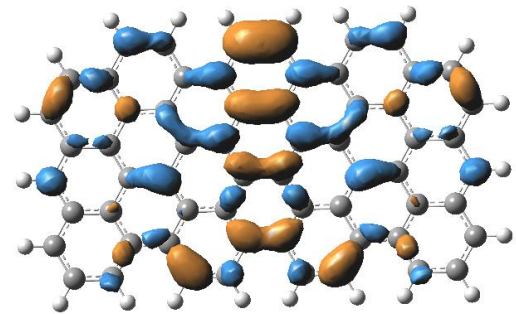

$S_{17}$

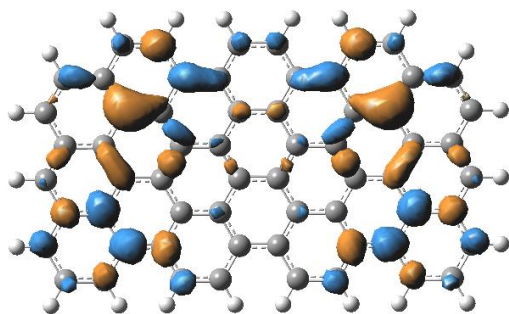

$S_{18}$

---

### 3. Electronic excited states and theoretical UV-absorption spectra for GrNP – DA binary complex.

**Table S4.** The frontier (HOMO and LUMO) orbitals of the isolated DA computed at  $\omega$ B97X-D3BJ/def2-TZVPP level of theory.

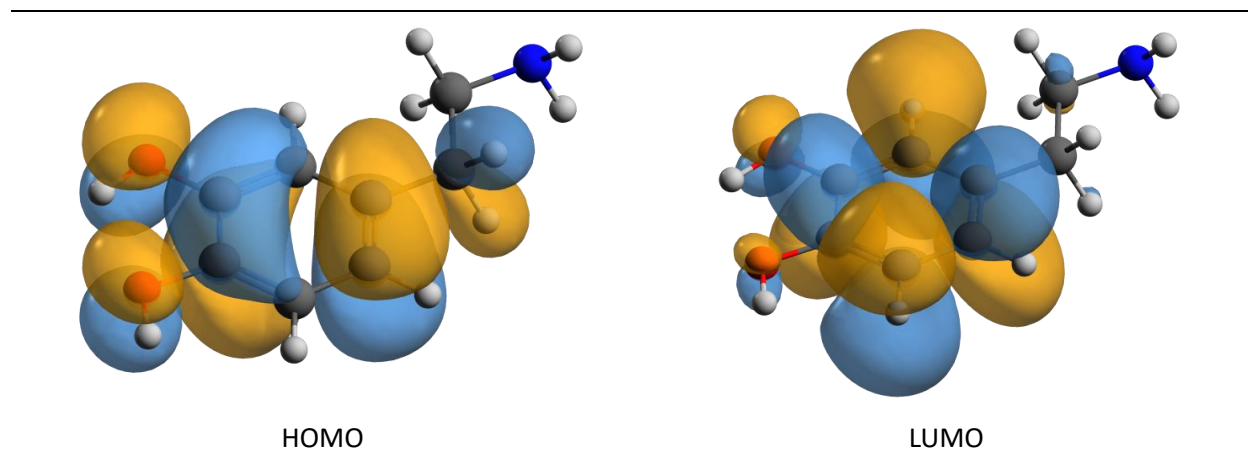

**Table S5.** The natural difference orbitals (NDO) between the ground and the given electronic excited state computed for the GrNP-DA binary complex at TDDFT/ $\omega$ B97X-D3BJ/def2-TZVPP level of theory (Blue = hole, Yellow = electron, orbital orders with red text color are specific to DA and blacks are graphene-types).

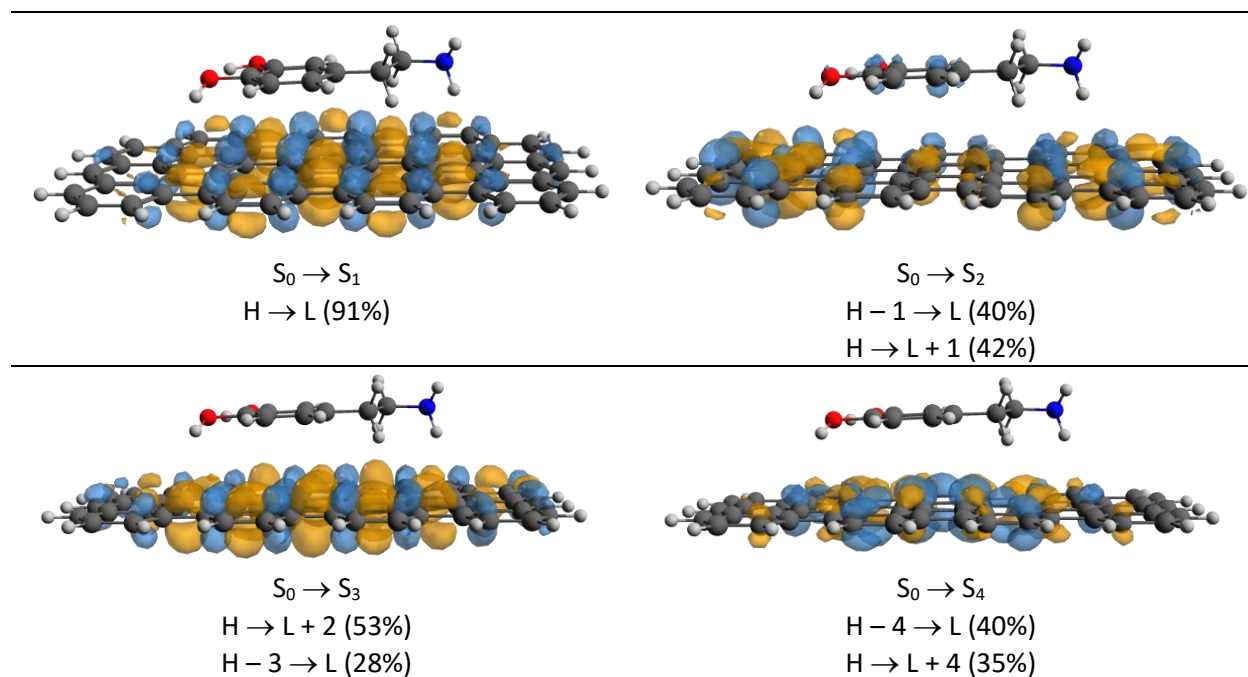

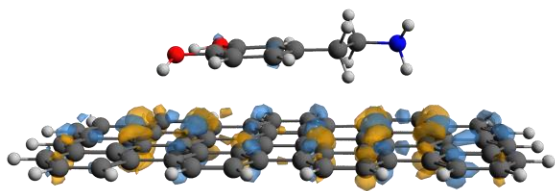

$S_0 \rightarrow S_5$   
 $H \rightarrow L + 3$  (40%)  
 $H - 5 \rightarrow L$  (17%)

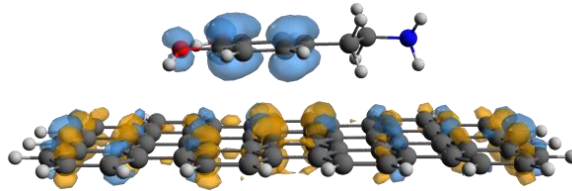

$S_0 \rightarrow S_6$   
 $H \rightarrow L + 5$  (37%)  
 $H - 1 \rightarrow L$  (17%)

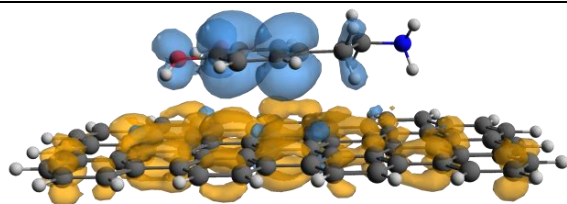

$S_0 \rightarrow S_7$   
 $H - 2 \rightarrow L$  (26%)  
 $H \rightarrow L + 5$  (21%)

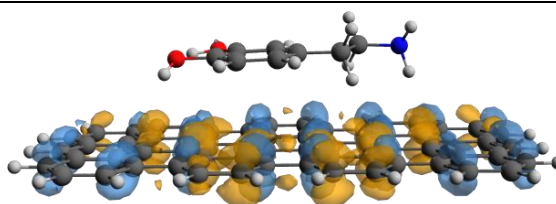

$S_0 \rightarrow S_8$   
 $H - 3 \rightarrow L$  (22%)  
 $H \rightarrow L + 2$  (17%)

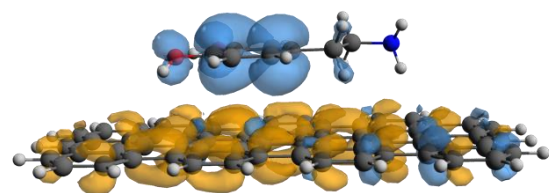

$S_0 \rightarrow S_9$   
 $H - 2 \rightarrow L$  (43%)

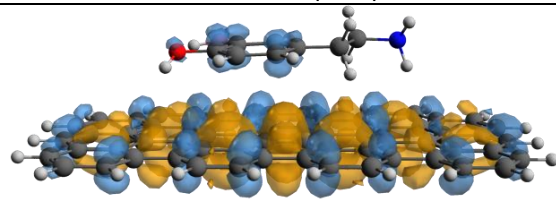

$S_0 \rightarrow S_{10}$   
 $H \rightarrow L + 7$  (43%);  $H \rightarrow L + 6$  (21%)

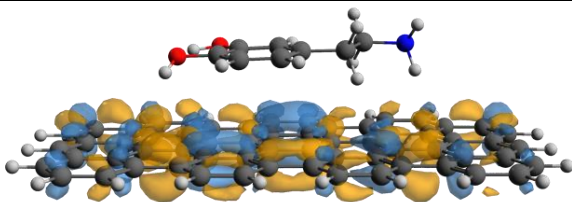

$S_0 \rightarrow S_{11}$   
 $H - 7 \rightarrow L$  (18%)  
 $H \rightarrow L + 9$  (17%)

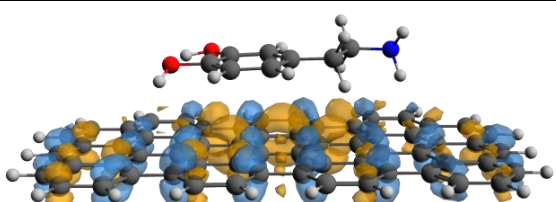

$S_0 \rightarrow S_{12}$   
 $H \rightarrow L + 7$  (18%)

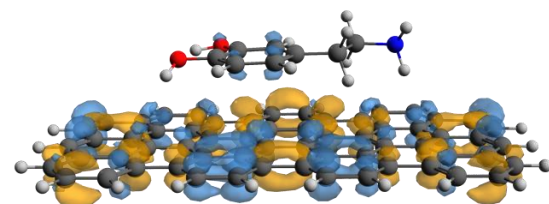

$S_0 \rightarrow S_{13}$   
 $H \rightarrow L + 8$  (23%)  
 $H - 1 \rightarrow L + 1$  (17%)

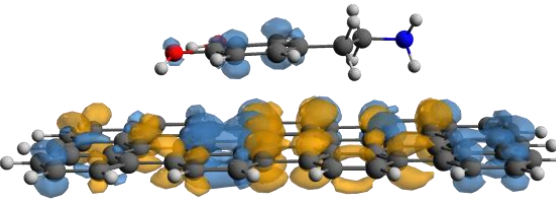

$S_0 \rightarrow S_{14}$   
 $H \rightarrow L + 9$  (21%)

**Table S5** (cont.). The natural difference orbitals (NDO) between the ground and the given electronic excited state computed for the GrNP-DA binary complex at TDDFT/ $\omega$ B97X-D3BJ/def2-TZVPP level of theory (Blue = hole, Yellow = electron, orbital orders with red text color are specific to DA and blacks are graphenetypes).

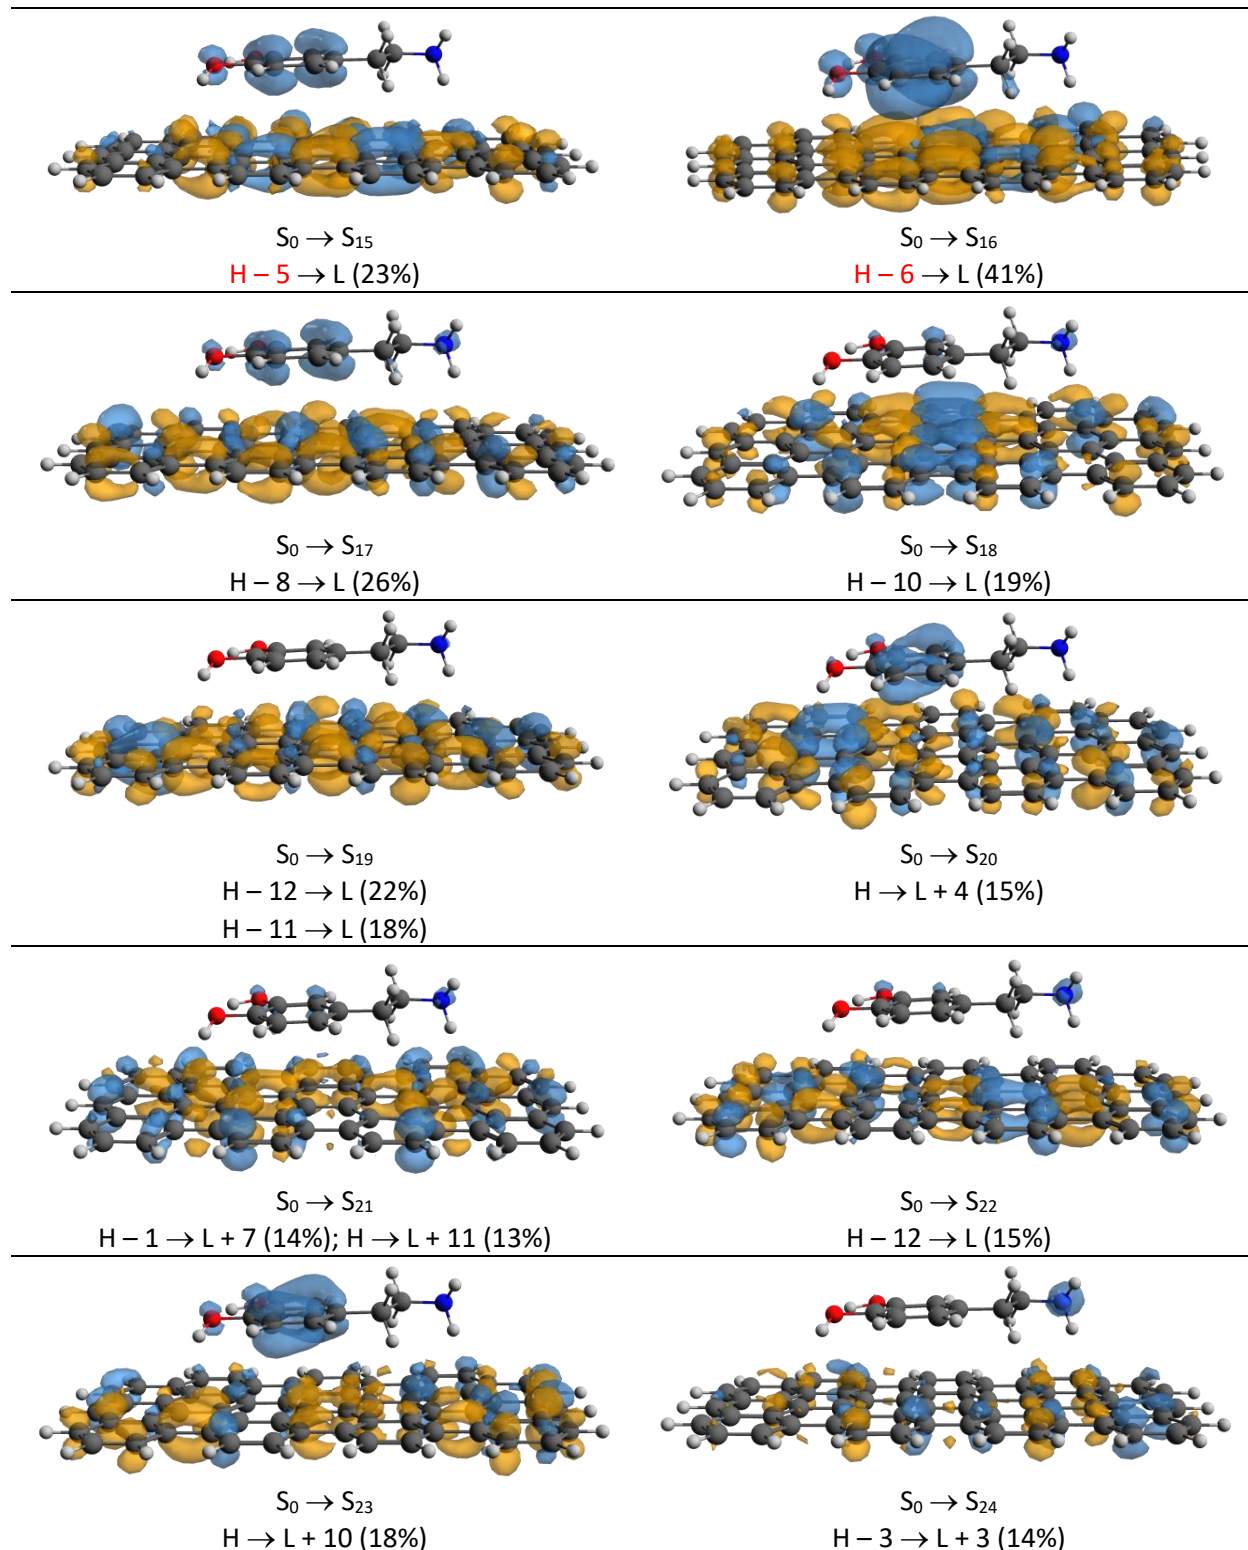



**Table S5** (cont.). The natural difference orbitals (NDO) between the ground and the given electronic excited state computed for the GrNP-DA binary complex at TDDFT/ $\omega$ B97X-D3BJ/def2-TZVPP level of theory (Blue = hole, Yellow = electron, orbital orders with red text color are specific to DA and blacks are graphenetypes).

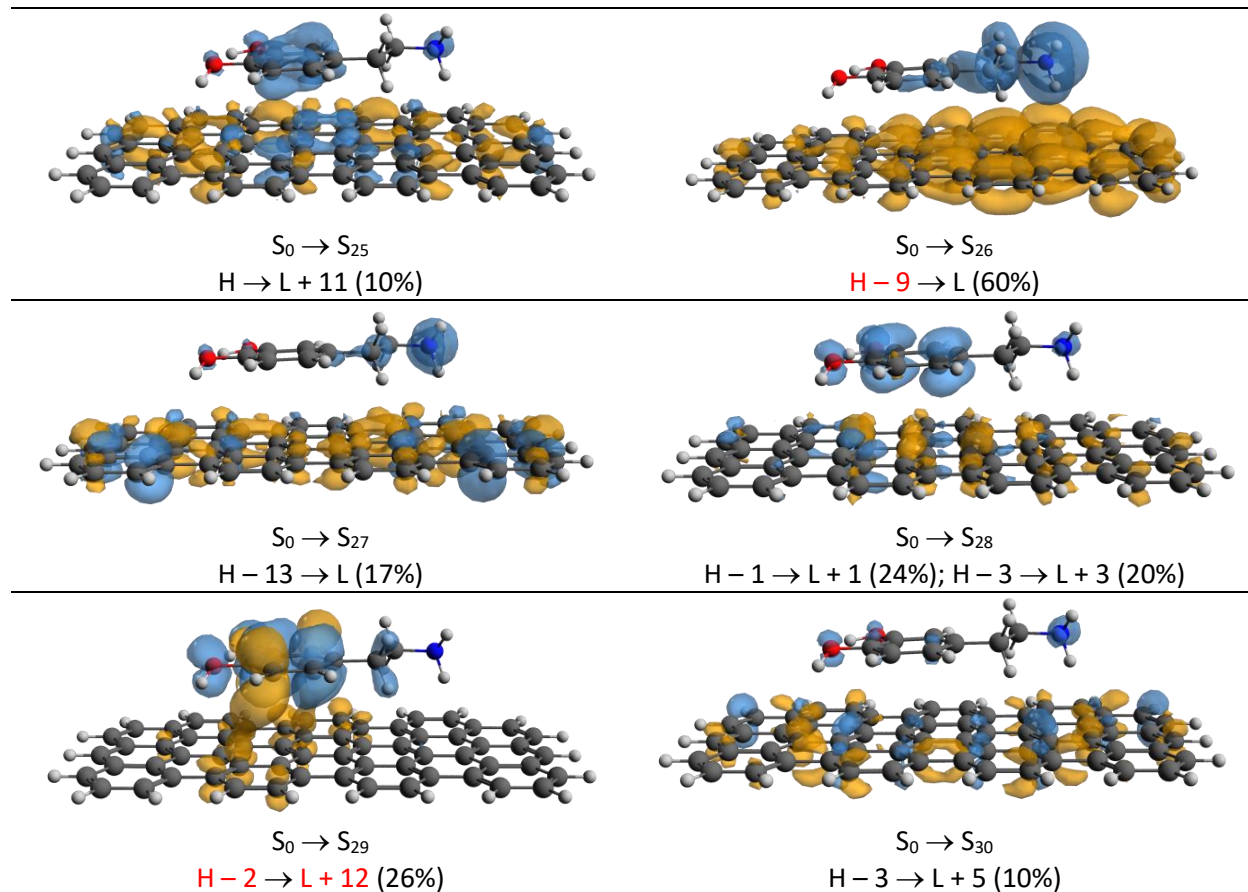

#### 4. Electronic excited states and theoretical UV-absorption spectra for GrNP – DAQ binary complex.

**Table S6.** The frontier (HOMO and LUMO) orbitals of the isolated DAQ computed at  $\omega$ B97X-D3BJ/def2-TZVPP level of theory.

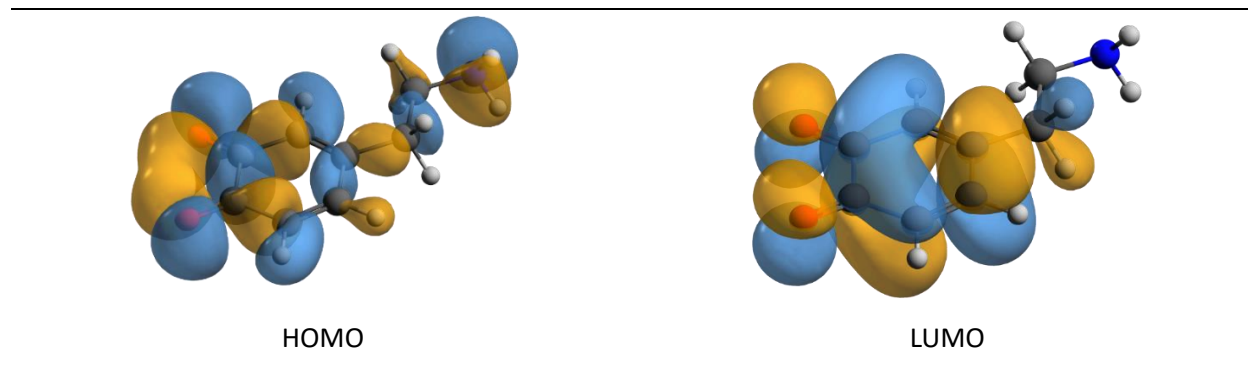

**Table S7.** The natural difference orbitals (NDO) between the ground and the given electronic excited state computed for the GrNP-DAQ binary complex at TDDFT/ $\omega$ B97X-D3BJ/def2-TZVPP level of theory (Blue = hole, Yellow = electron, orbital orders with red text color are specific to DA and blacks are graphene-types).

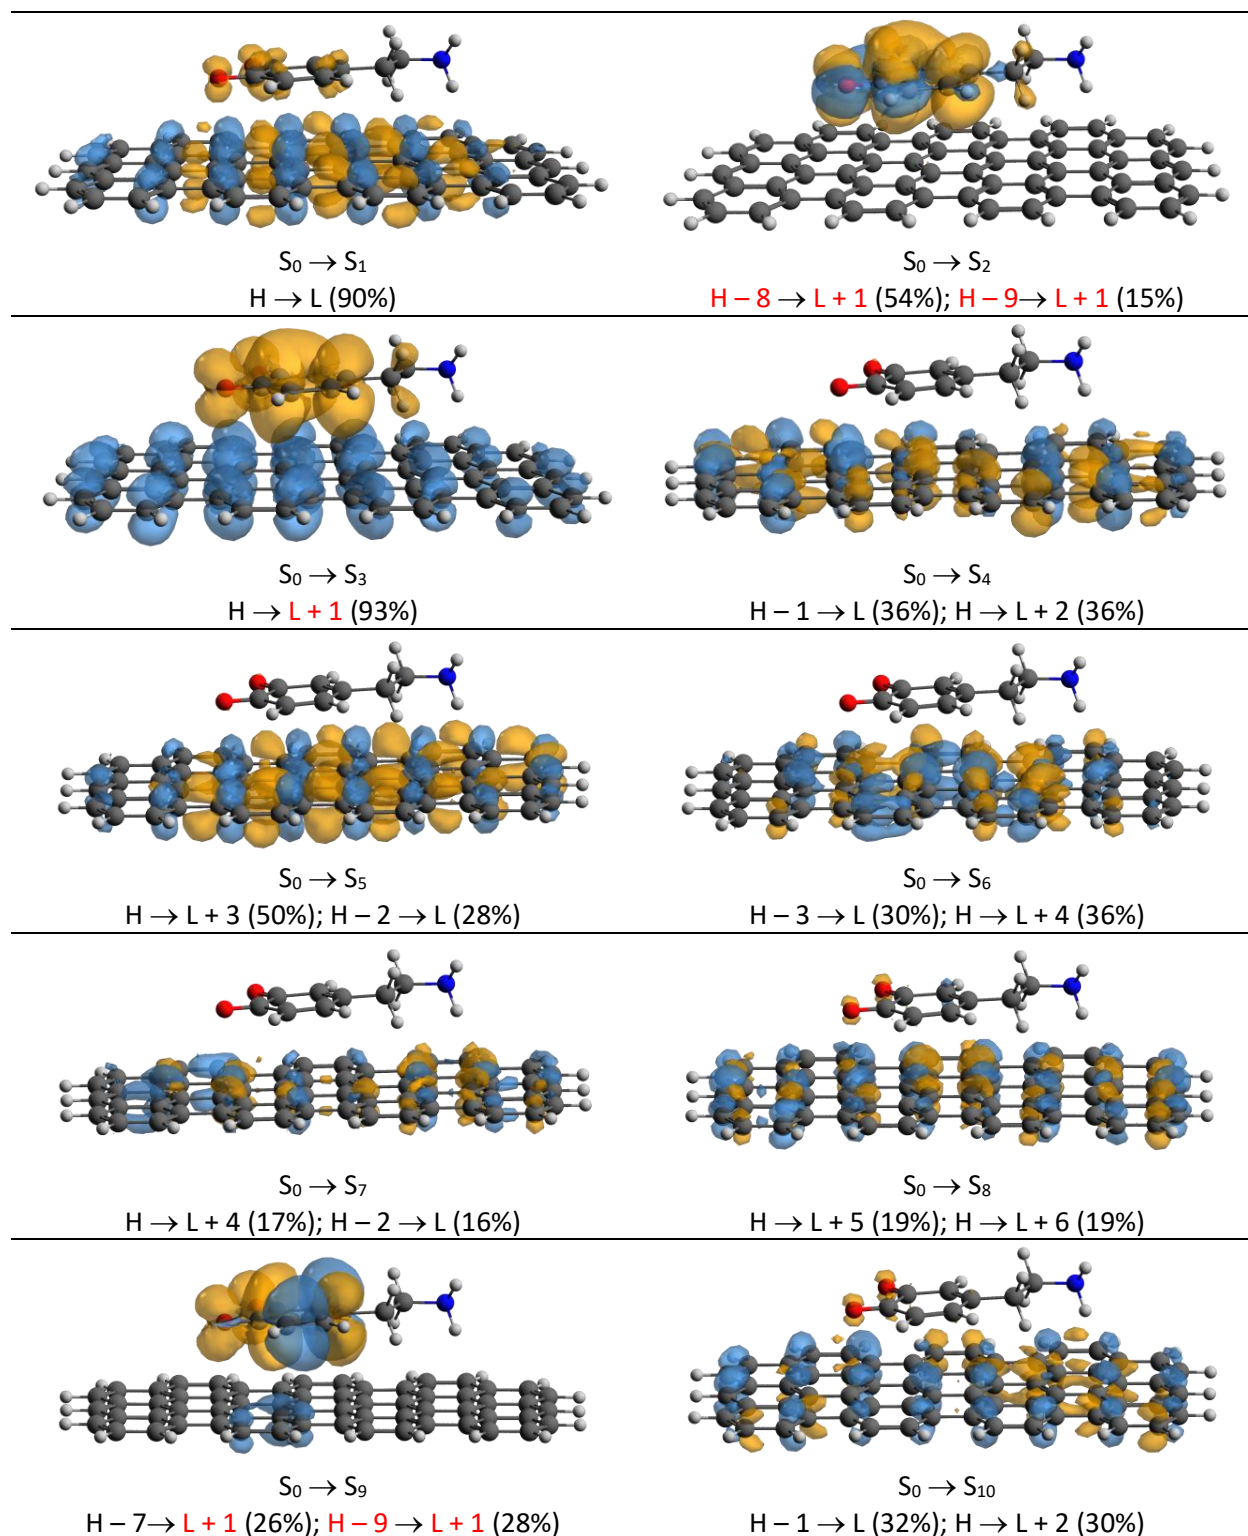

**Table S7** (cont.). The natural difference orbitals (NDO) between the ground and the given electronic excited state computed for the GrNP-DAQ binary complex at TDDFT/ $\omega$ B97X-D3BJ/def2-TZVPP level of theory (Blue = hole, Yellow = electron, orbital orders with red text color are specific to DA and blacks are graphene-types).

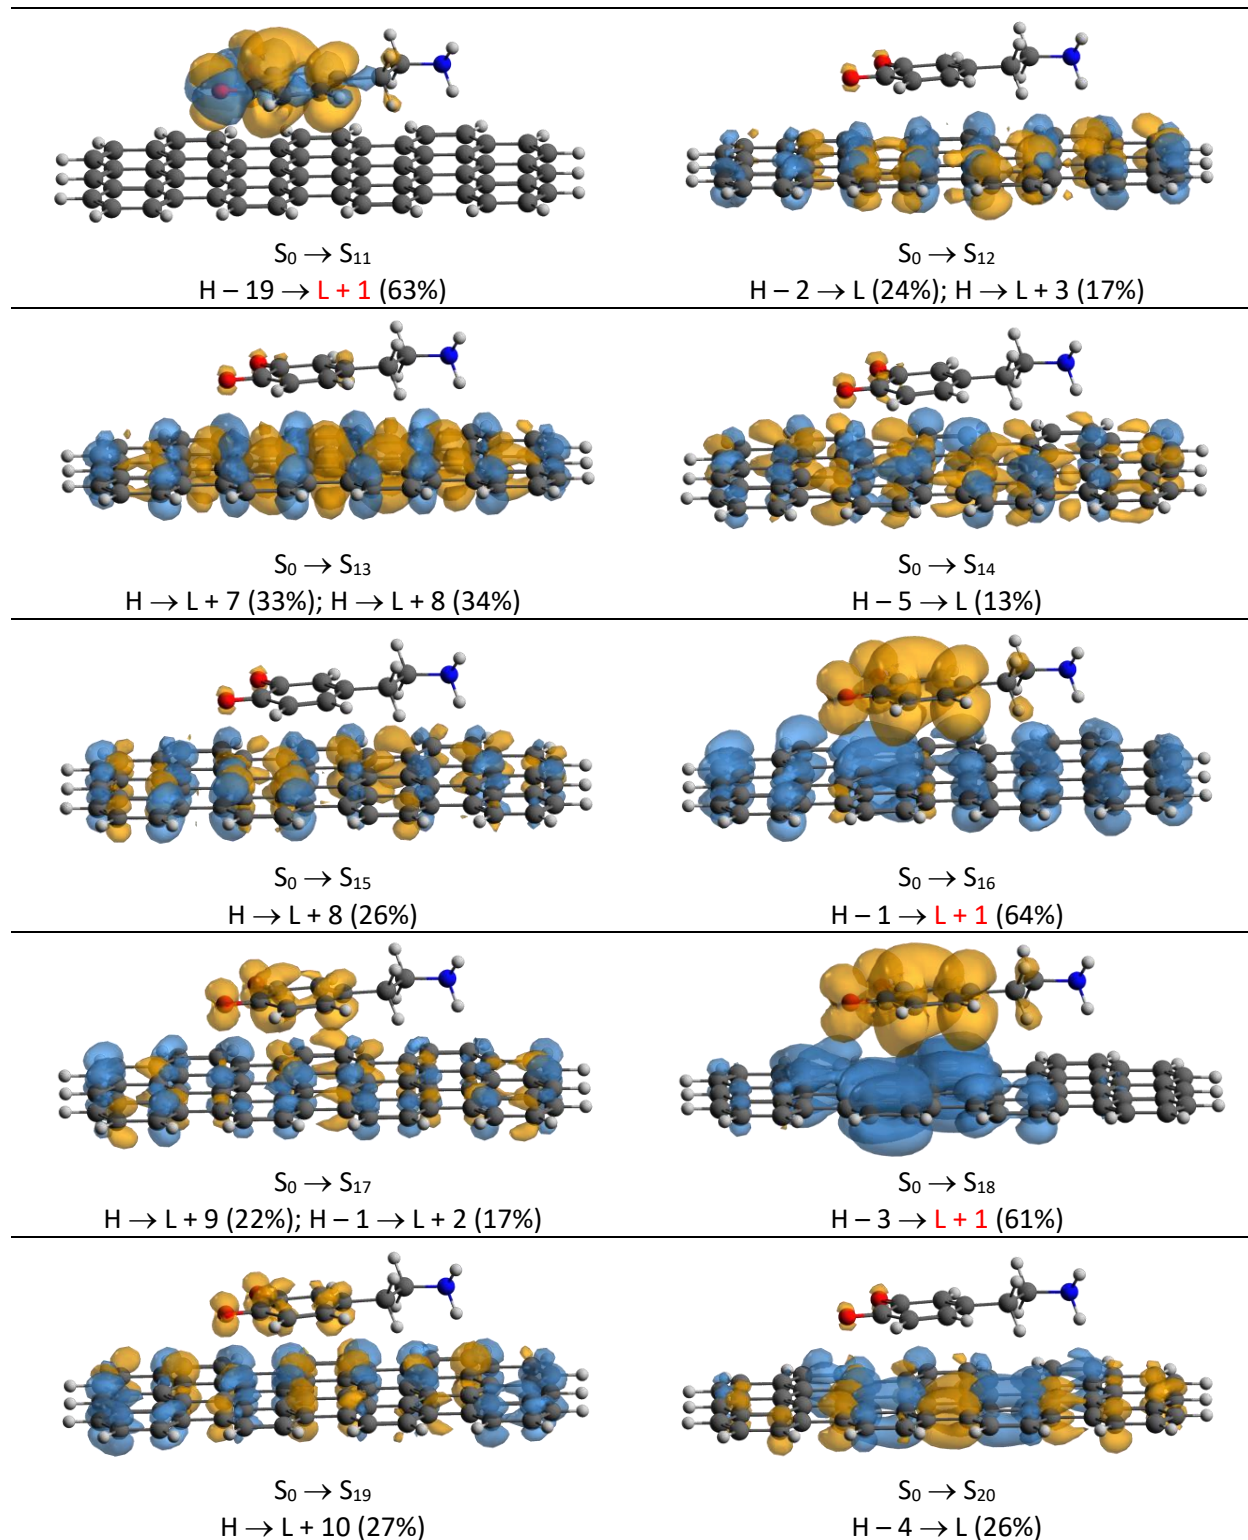

**Table S7** (cont.). The natural difference orbitals (NDO) between the ground and the given electronic excited state computed for the GrNP-DAQ binary complex at TDDFT/ $\omega$ B97X-D3BJ/def2-TZVPP level of theory (Blue = hole, Yellow = electron, orbital orders with red text color are specific to DA and blacks are graphenetypes).

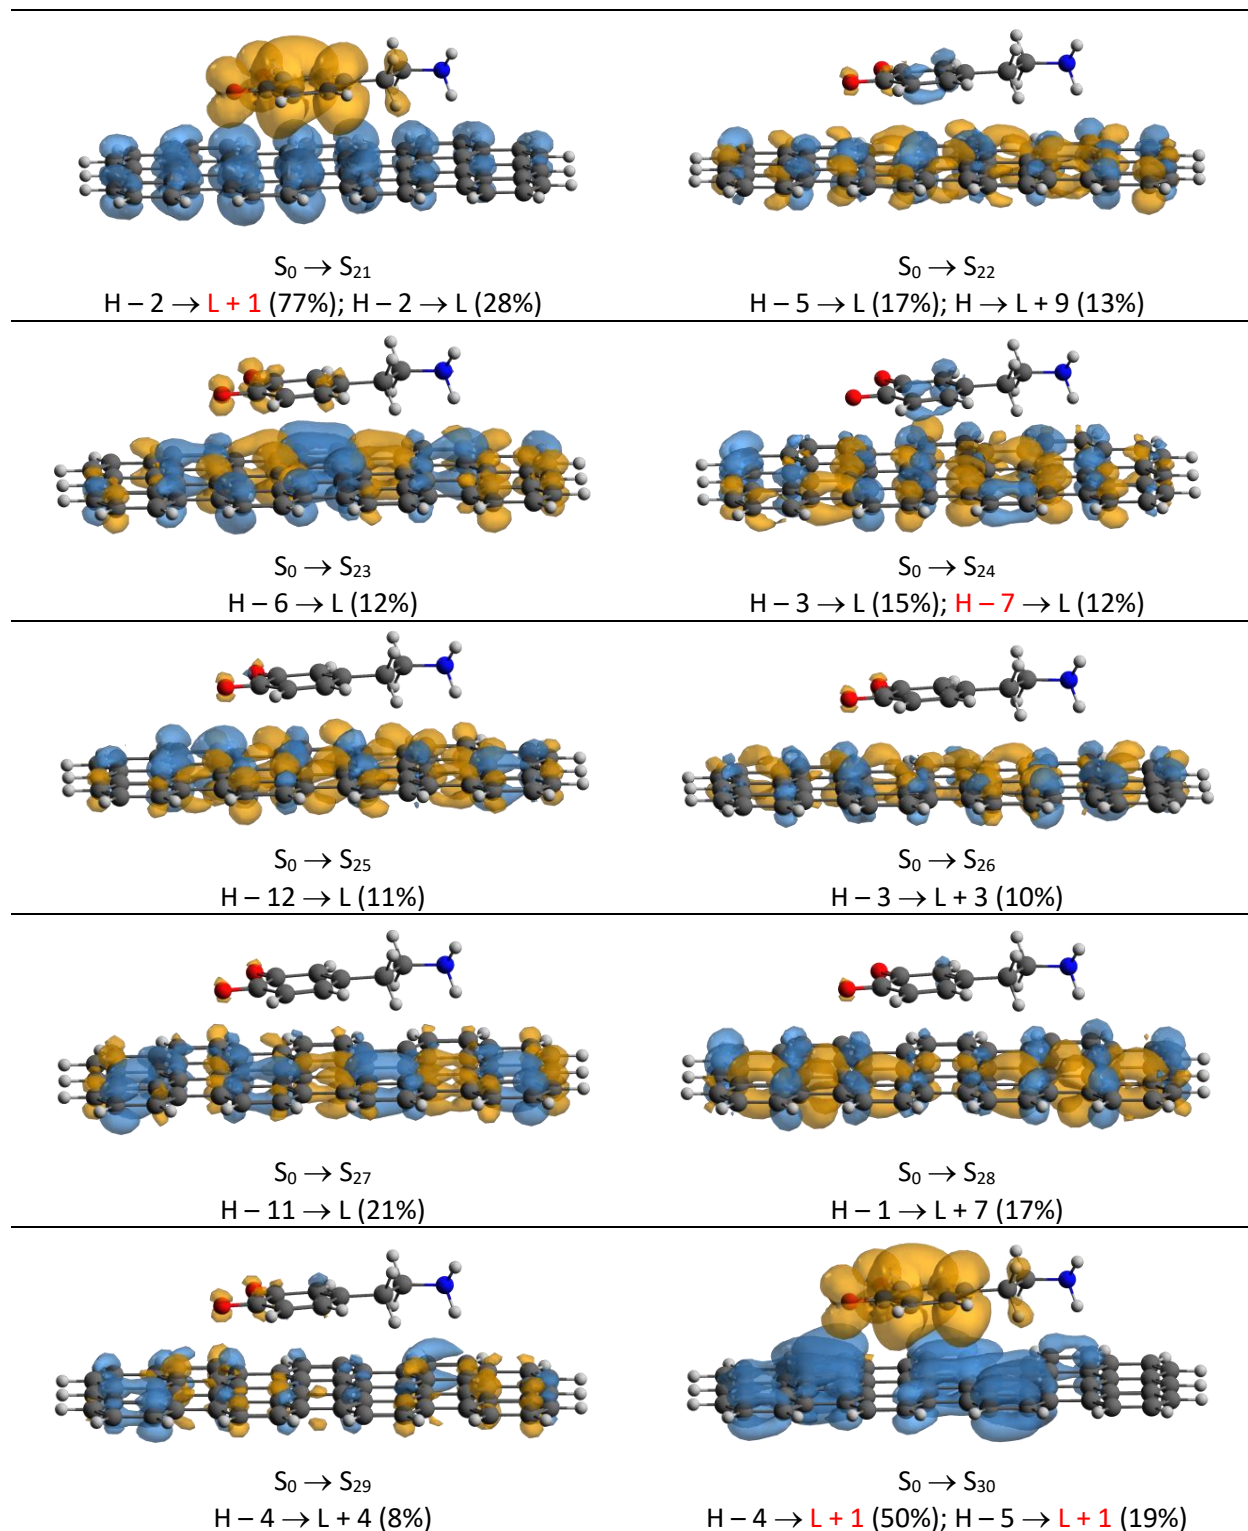

Supplement: d4cp00432a1.pdf [file d4cp00432a1.pdf]
